# Supplementary material
Source: PubMed Central journal article supplement (PMC4011343)
Supplement: cr201442x10.pdf [file cr201442x10.pdf]

## X-Ray data collection and structure determination statistics

| Parameter          | Overall (Highest shell)                  | Overall (Highest shell)                   |
|--------------------|------------------------------------------|-------------------------------------------|
| Protein            | MHF1 (1-110) + MHF2                      | MHF1(1-110) + MHF2 + MID(669 - 800)       |
| Beamline           | APS-23-ID-B                              | APS-23-ID-B                               |
| Collection date    | 09-Mar-2011                              | 09-Mar-2011                               |
| Space Group        | P12 <sub>1</sub> 1                       | P12 <sub>1</sub> 1                        |
| Unit Cell          | a=40.78Å b=91.93Å, c=61.43 Å<br>β=96.30° | a=110.98Å b=69.97Å, c=116.05Å<br>β=91.60° |
| Solvent content    | 56.8%                                    | 57.7%                                     |
| V <sub>m</sub>     | 2.84 Å <sup>3</sup> /Da                  | 2.90 Å <sup>3</sup> /Da                   |
| Resolution         | 45.97-2.10 Å (2.15-2.10) *               | 49.51-2.00 Å (2.05-2.00)                  |
| I/σ                | 11.71 (3.52)                             | 14.90 (3.04)                              |
| Completeness       | 96.6% (96.9%)                            | 98.9% (99.7%)                             |
| R <sub>merge</sub> | 0.066 (0.548)                            | 0.052 (0.512)                             |
| Multiplicity       | 2.70 (2.73)                              | 3.50 (3.56)                               |
| Reflections        | 26336 (1931)                             | 120454 (8895)                             |
| Mosaicity          | 0.30                                     | 0.15                                      |
| R                  | 0.200 (0.236)                            | 0.202 (0.286)                             |
| R <sub>free</sub>  | 0.231 (0.288)                            | 0.245 (0.334)                             |
| Ramachandran       |                                          |                                           |
| Favored            | 99.13%                                   | 98.77%                                    |
| Allowed            | 100.0%                                   | 100.0%                                    |
| Molprobit Score    | 100 <sup>th</sup> percentile             | 99 <sup>th</sup> percentile               |

\*parentheses indicate values for highest resolution shell.
